# Supplementary material for: LOXL4, but not LOXL2, is the critical determinant of pathological collagen cross-linking and fibrosis in the lung
Source: PubMed Central journal article supplement — Sci Adv. 2023 May 26;9(21):eadf0133. doi: 10.1126/sciadv.adf0133 (PMC10219590; doi:10.1126/sciadv.adf0133), 2023-05-26
Supplement: sciadv.adf0133_sm.pdf [file sciadv.adf0133_sm.pdf]

Supplementary Materials for  
**LOXL4, but not LOXL2, is the critical determinant of pathological collagen cross-linking and fibrosis in the lung**

Hsiao-Yen Ma *et al.*

Corresponding author: Ning Ding, ding.ning@gene.com

*Sci. Adv.* **9**, eadf0133 (2023)  
DOI: 10.1126/sciadv.adf0133

**This PDF file includes:**

Figs. S1 to S8  
Table S1

Figure S1

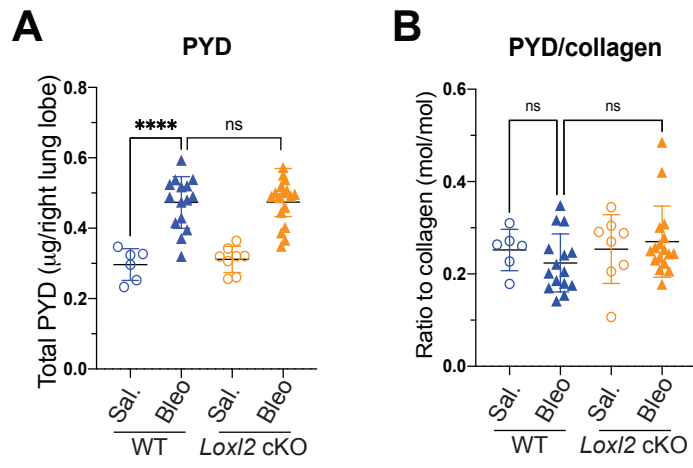

Figure S2

**A**

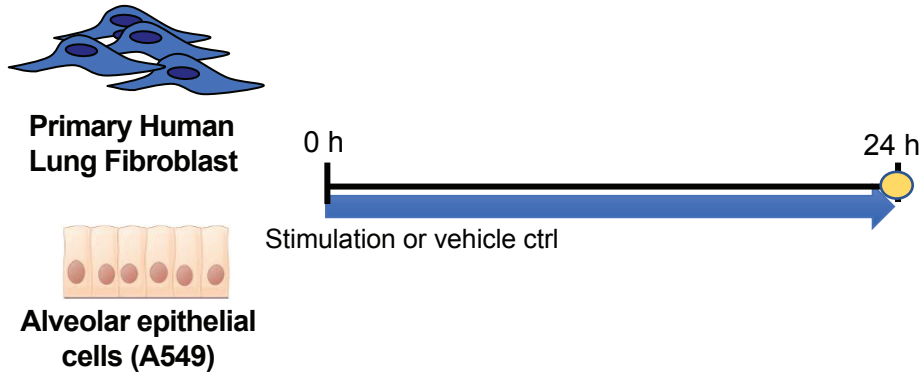

**B**

**HLF**

*LOXL4*

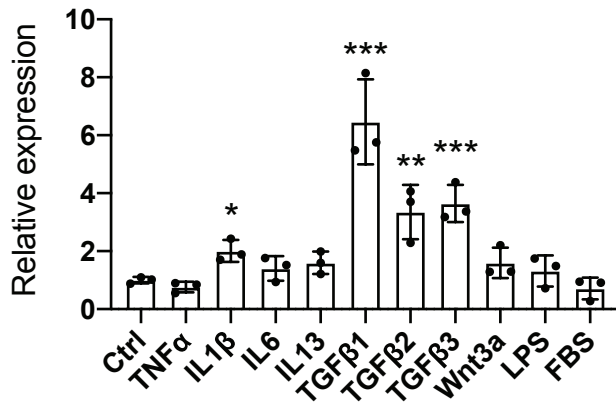

**C**

**A549**

*LOXL4*

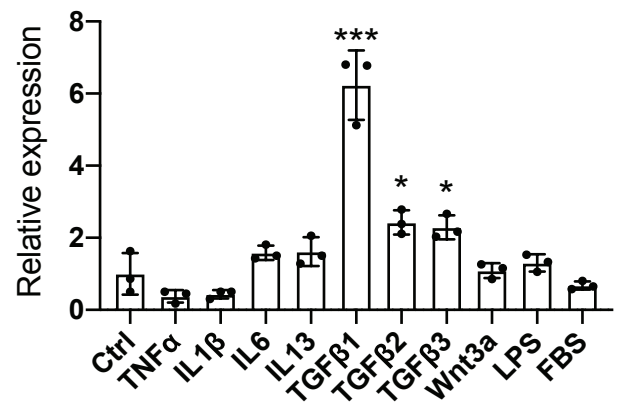

Figure S3

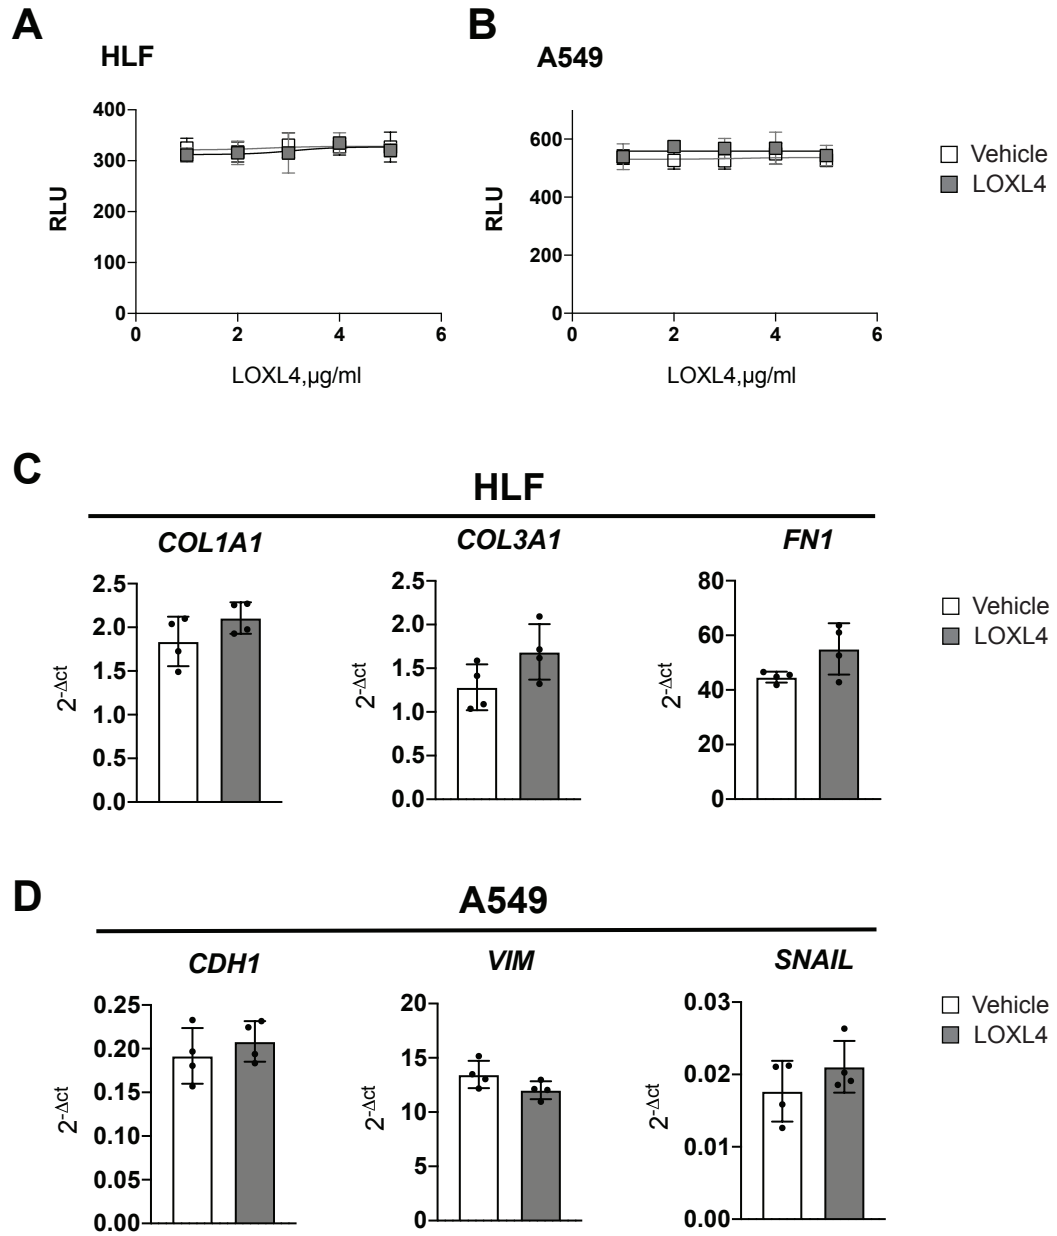



Figure S4

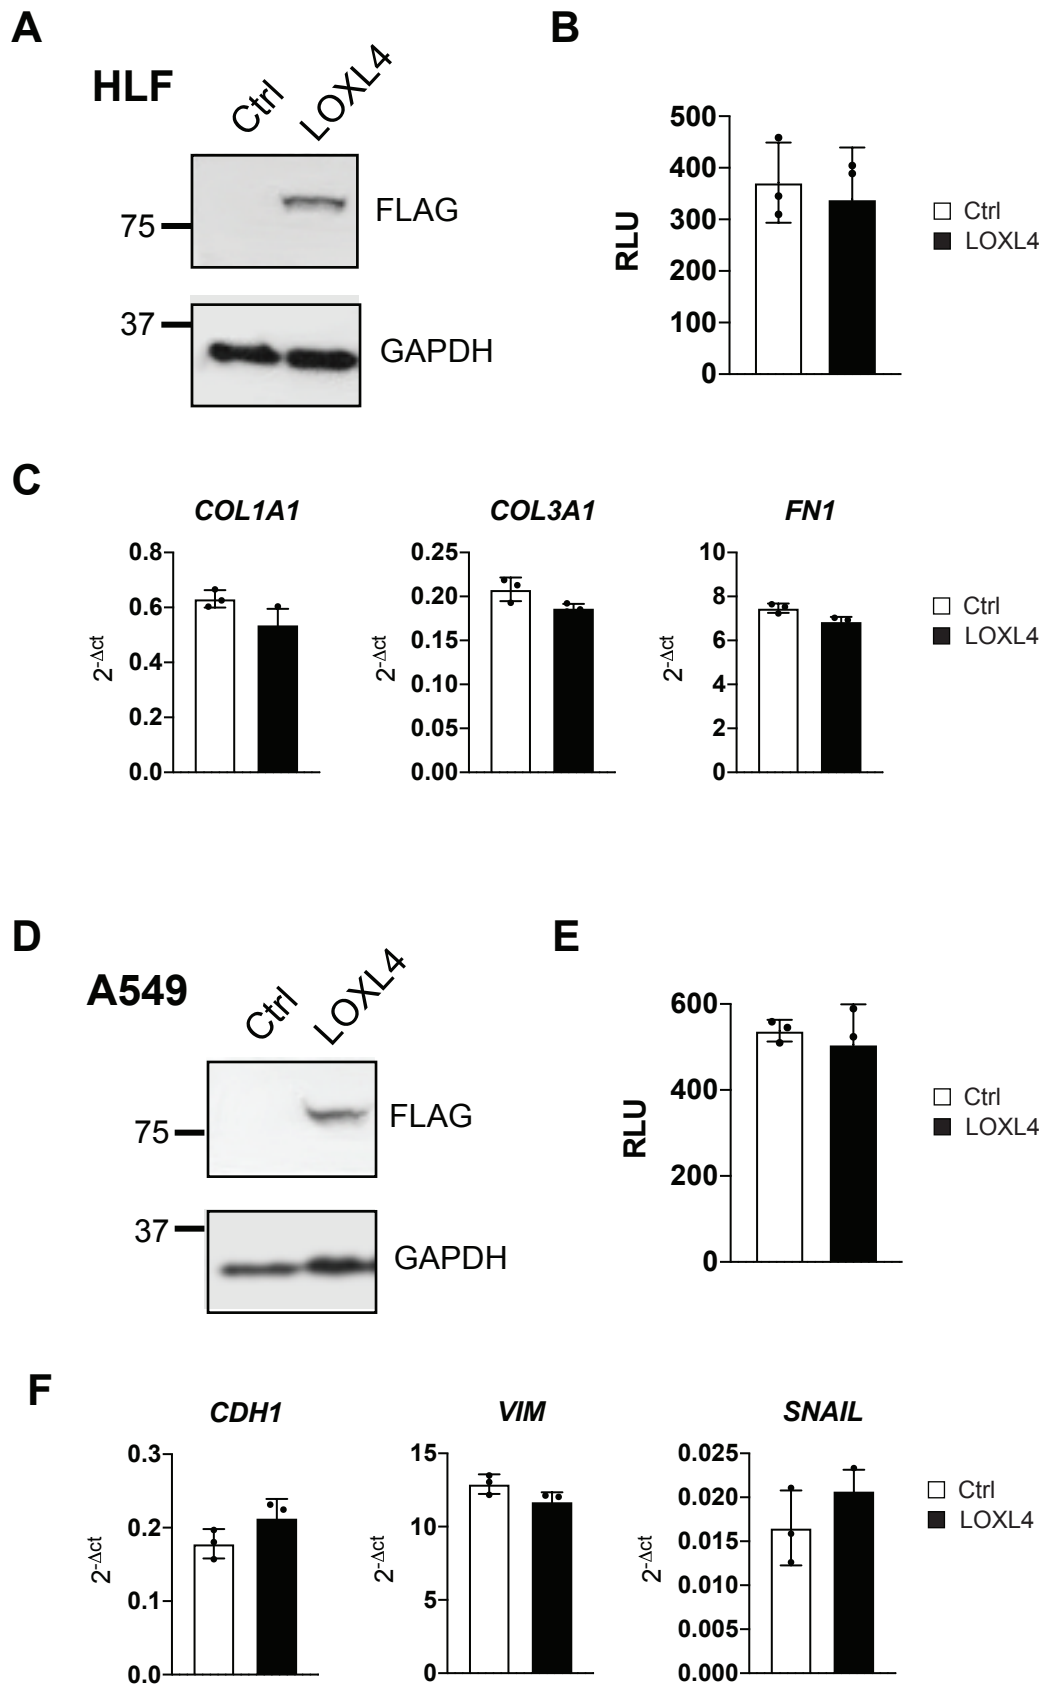

Figure S5

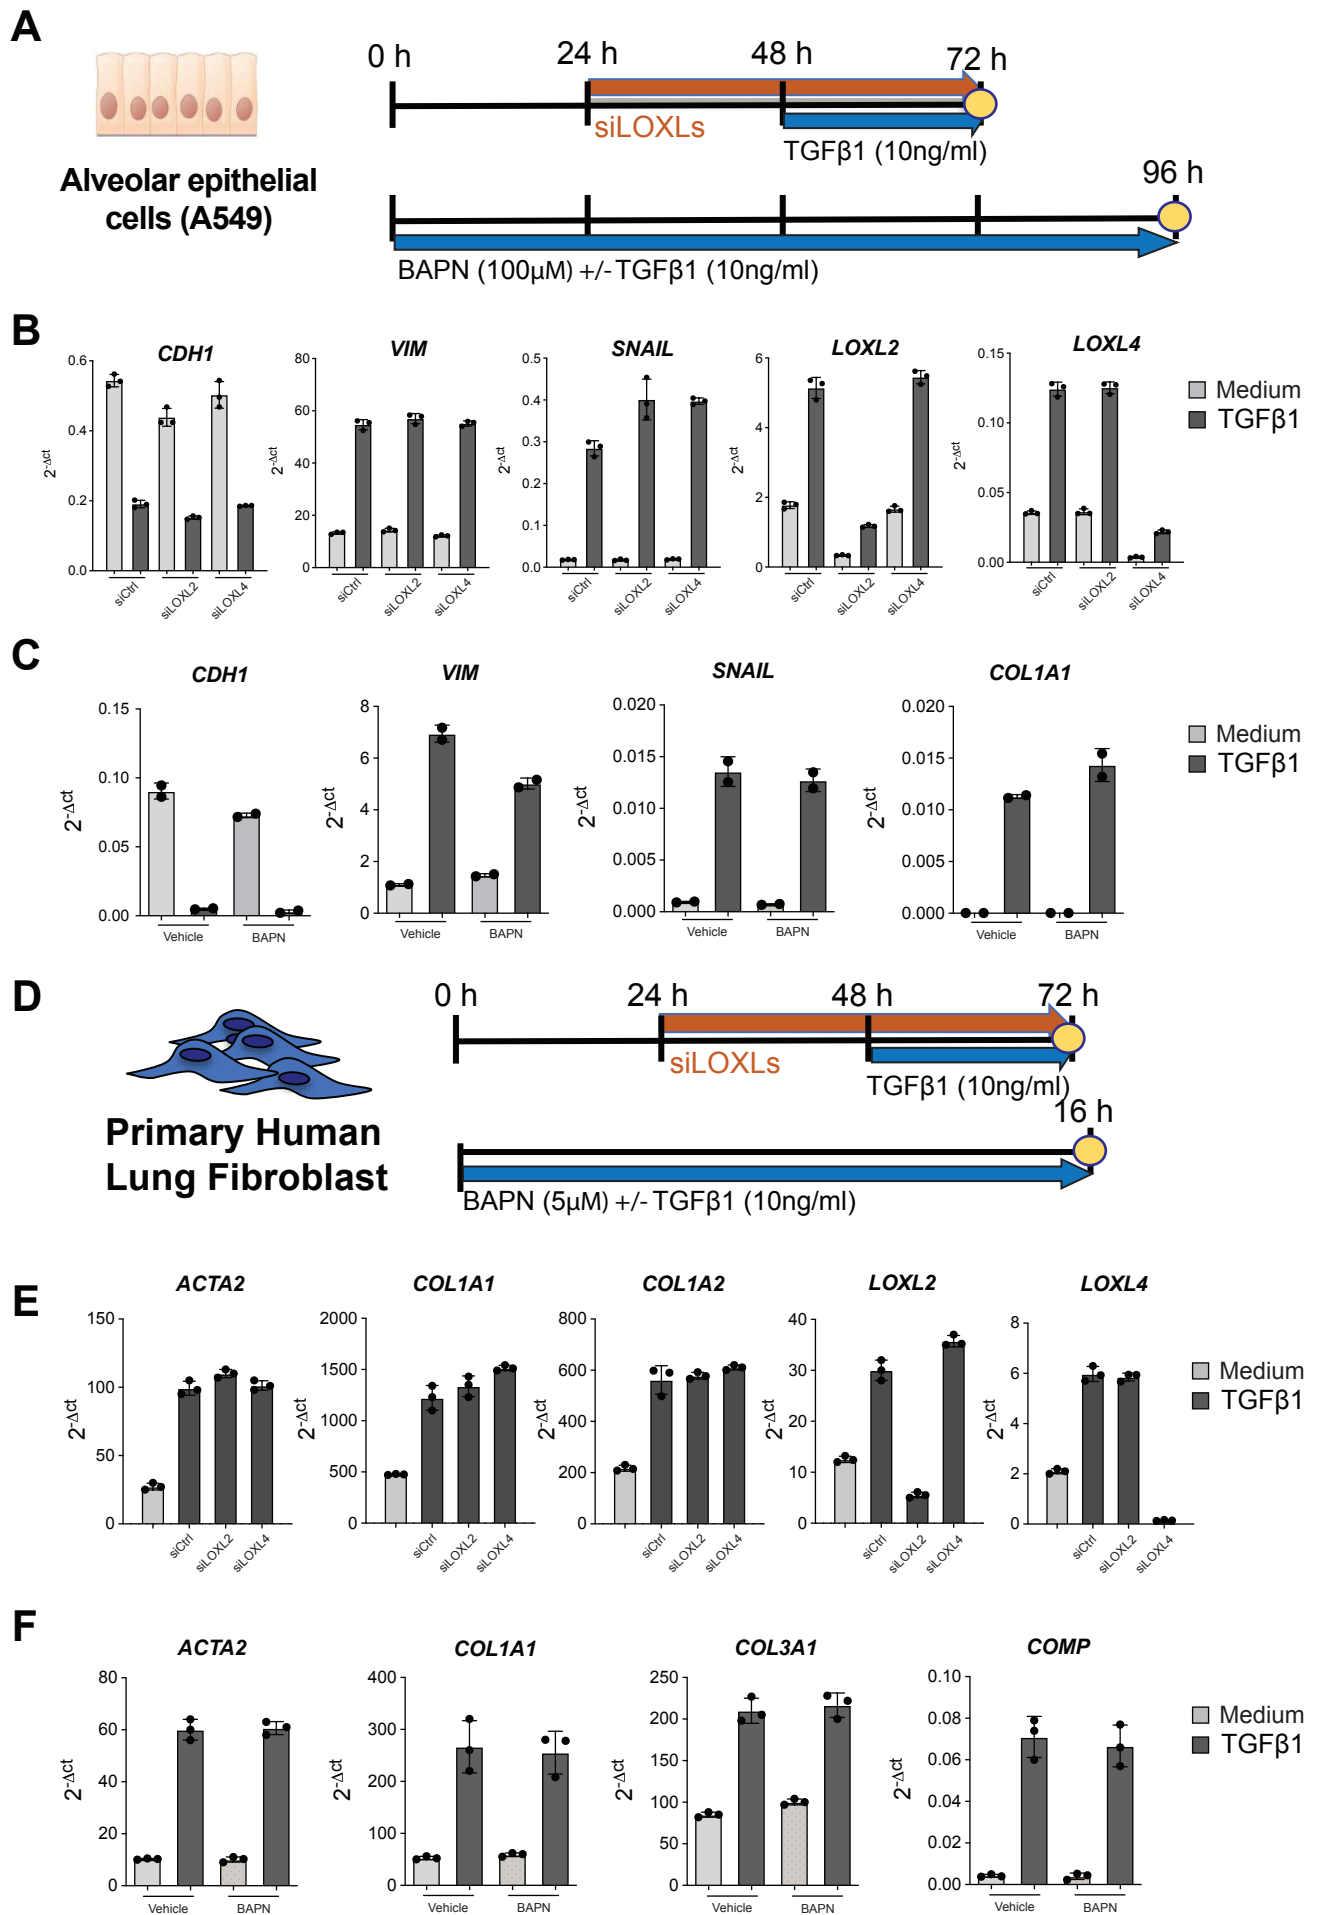

Figure S6

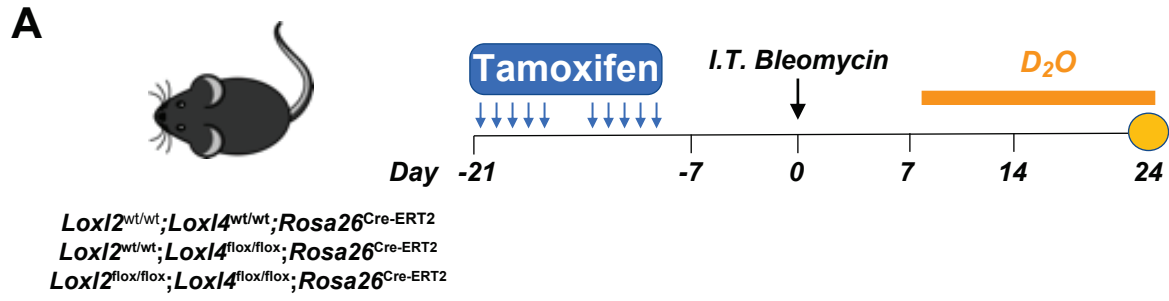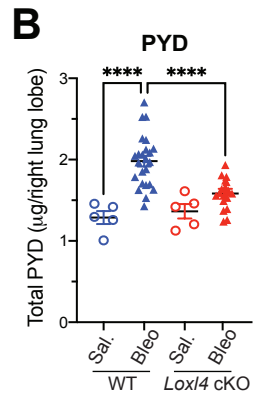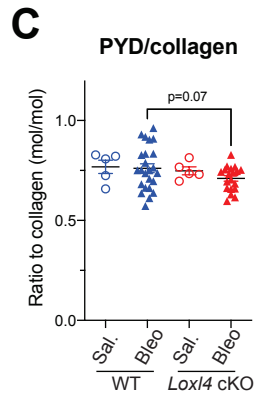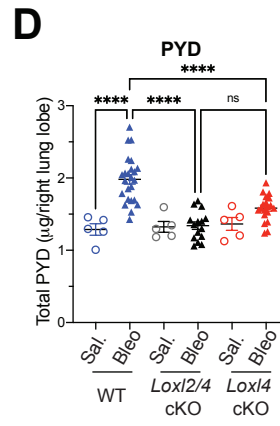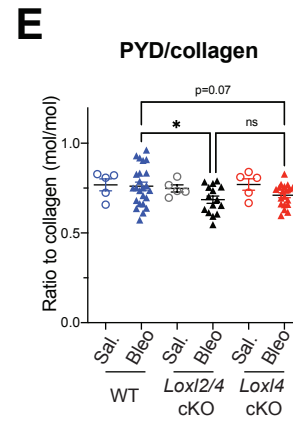

Figure S7

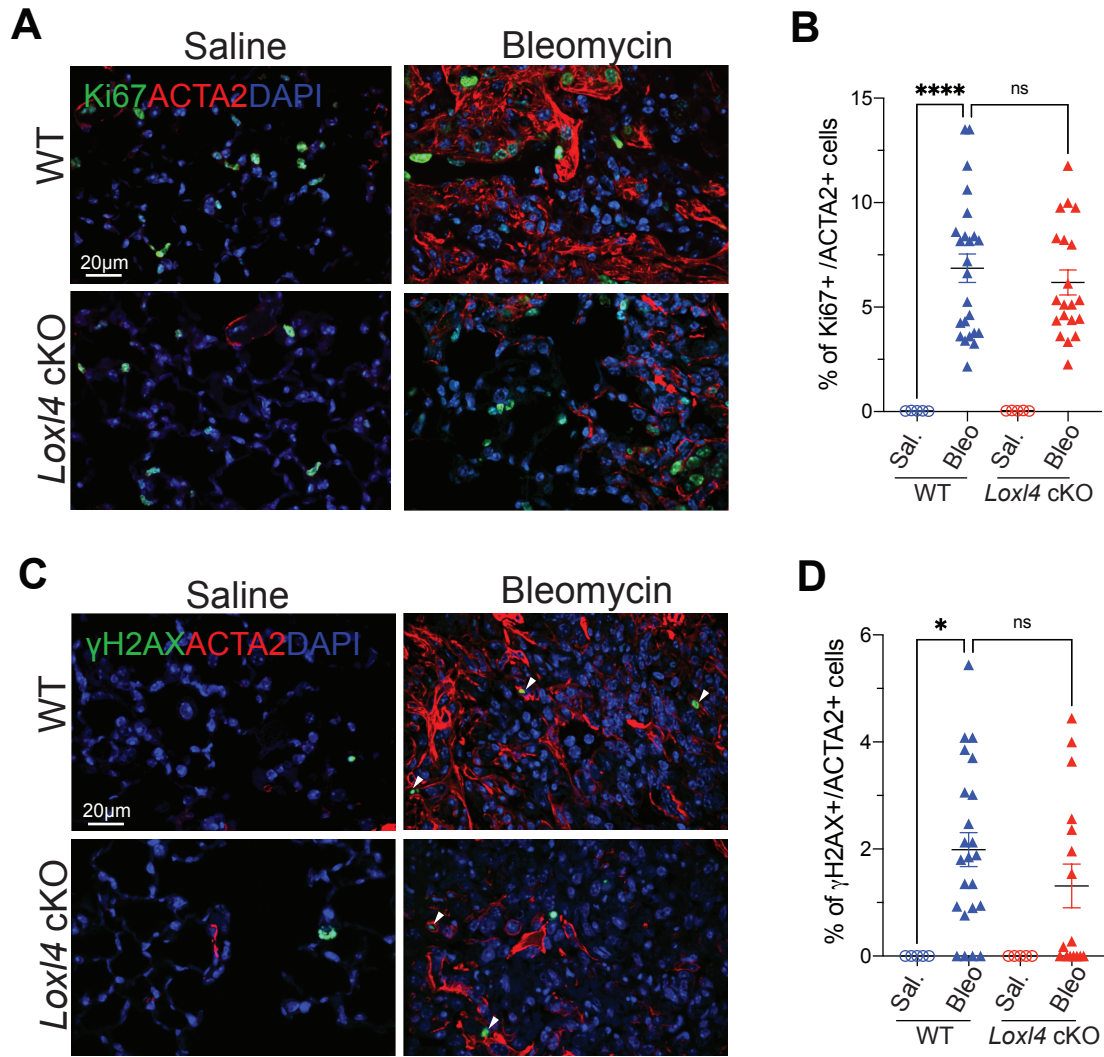

Figure S8

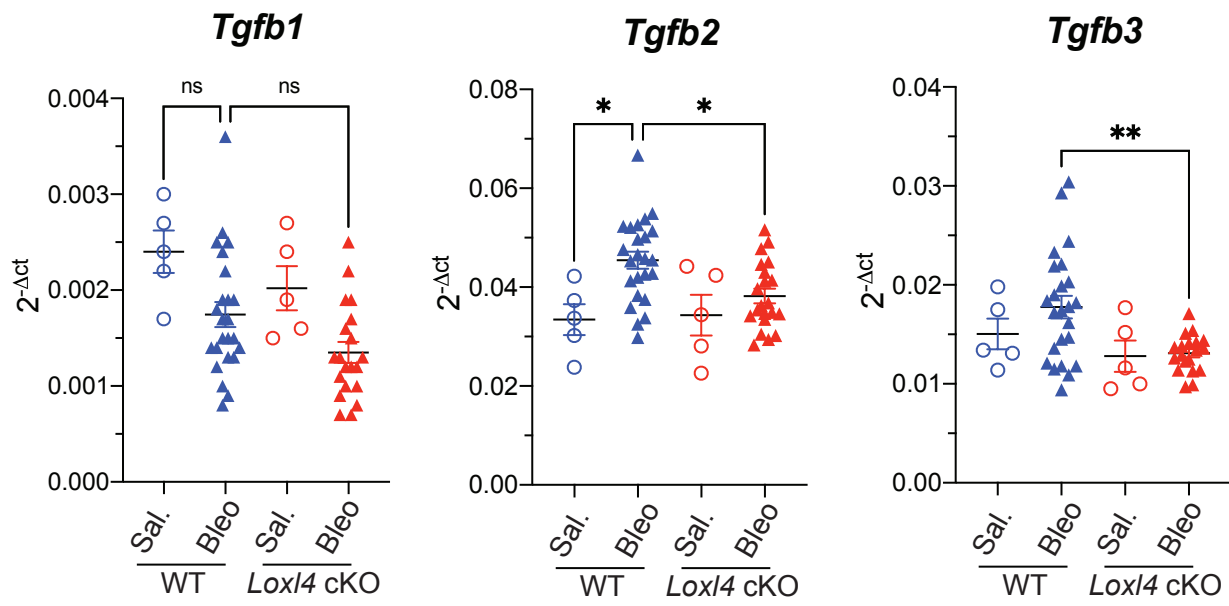

Table S1. List of primers used for qPCR

| <b>Mouse Primer</b> | <b>Sequence</b>         |
|---------------------|-------------------------|
| <i>mAnkrd1-F</i>    | GCTGGTAACAGGCAAAAAGAAC  |
| <i>mAnkrd1-R</i>    | CCTCTCGCAGTTTCTCGCT     |
| <i>mCol1a1-F</i>    | GCTCCTCTTAGGGGCCACT     |
| <i>mCol1a1-R</i>    | CCACGTCTCACCATTGGGG     |
| <i>mCol1a2-F</i>    | GTAACCTCGTGCCTAGCAACA   |
| <i>mCol1a2-R</i>    | CCTTTGTCAGAATACTGAGCAGC |
| <i>mComp-F</i>      | ACTGCCTGCGTTCTAGTGC     |
| <i>mComp-R</i>      | CGCCGCATTAGTCTCCTGAA    |
| <i>mCTGF-F</i>      | GGGCCTCTTCTGCGATTC      |
| <i>mCTGF-R</i>      | ATCCAGGCAAGTGCATTGGTA   |
| <i>mFn1-F</i>       | ATGTGGACCCCTCCTGATAGT   |
| <i>mFn1-R</i>       | GCCAGTGATTTAGCAAAGG     |
| <i>mLox-F</i>       | TCTTCTGCTGCGTGACAACC    |
| <i>mLox-R</i>       | GAGAAACCAGCTTGGAACCAG   |
| <i>mLoxl1-F</i>     | GAGTGCTATTGCGCTTCCC     |
| <i>mLoxl1-R</i>     | GGTTGCCGAAGTCACAGGT     |
| <i>mLoxl2-F</i>     | ATTAACCCCAACTATGAAGTGCC |
| <i>mLoxl2-R</i>     | CTGTCTCCTCACTGAAGGCTC   |
| <i>mLoxl3-F</i>     | CTACTGCTGCTACACTGTCTGT  |
| <i>mLoxl3-R</i>     | GACCTTCATAGGGCTTTCTAGGA |
| <i>mLoxl4-F</i>     | AGCGGACAGACCAGAGGAG     |
| <i>mLoxl4-R</i>     | CCTTGACCATACTTGGCACTG   |
| <i>mTGFB1-F</i>     | CTCCCGTGGCTTCTAGTGC     |
| <i>mTGFB1-R</i>     | GCCTTAGTTTGGACAGGATCTG  |
| <i>mTGFB2-F</i>     | CTTCGACGTGACAGACGCT     |
| <i>mTGFB2-R</i>     | GCAGGGCAGTGTAACCTTATT   |
| <i>mTGFB3-F</i>     | CCTGGCCCTGCTGAACTTG     |
| <i>mTGFB3-R</i>     | TTGATGTGGCCGAAGTCCAAC   |
| <i>mTnc-F</i>       | ACGGCTACCACAGAAGCTG     |
| <i>mTnc-R</i>       | ATGGCTGTTGTTGCTATGGCA   |
| <i>mSerpine1-F</i>  | TTCAGCCCTTGCTTGCCCTC    |
| <i>mSerpine1-R</i>  | ACACTTTTACTCCGAAGTCGGT  |
| <b>Human Primer</b> | <b>Taqman Probe ID</b>  |
| <i>hACTA2</i>       | Hs00426835_g1           |
| <i>hCDH</i>         | Hs01023894_m1           |
| <i>hCOL1A1</i>      | Ha00164004_m1           |
| <i>hCOL1A2</i>      | Hs01028956_m1           |
| <i>hCOL3A1</i>      | Hs00943809_m1           |
| <i>hCOMP</i>        | Hs00164359_m1           |
| <i>hFN1</i>         | Hs00365052_m1           |
| <i>hLOXL2</i>       | Hs00158757_m1           |
| <i>hLOXL4</i>       | Hs00260059_m1           |
| <i>hSNAIL</i>       | Hs00195591_m1           |
| <i>hVIM</i>         | Hs00958111_m1           |

## Supplementary figure legends

### Figure S1. LOXL2 deficiency does not affect PYD levels in the bleomycin model

(A-B) Quantification of lung collagen crosslinking by (A) total PYD and (B) PYD normalized by collagen. WT: Saline n=6, bleomycin n=15; *Loxl2* cKO: saline n=8, bleomycin n=17. Data represents mean  $\pm$  S.D. \*\*\*\* p < 0.0001. ns, not significant. p-value is calculated using one-way ANOVA.

### Figure S2. TGF $\beta$ is the main upstream regulator of LOXL4 expression in human lung epithelial cells and lung fibroblasts *in vitro*.

(A) Experiment scheme of screening a variety of pro-fibrotic and pro-inflammatory cytokines and stimuli in human lung fibroblasts (HLFs) and human lung epithelial cells (A549) *in vitro*. (B-C) mRNA expression of *LOXL4* in response to various stimulations in (B) HLFs and (C) A549 cells. mRNA levels are expressed relative to mean mRNA levels in cells with control treatment, which was arbitrarily assigned a value of 1. Data represents mean  $\pm$  S.D. Similar results were seen in three independent experiments. \* p < 0.05, \*\* p < 0.01, \*\*\* p < 0.001, p-value is calculated using unpaired t-test.

### Figure S3. Recombinant LOXL4 protein does not impact EMT or lung fibroblast activation *in vitro*.

(A-B) (A) HLFs and (B) A549 cells were treated with recombinant LOXL4 protein at the indicated concentrations for 24 hours followed by CellTiter-Glo assay. (C) mRNA expression of *COL1A1*, *COL3A1* and *FNI* in response to recombinant LOXL4 (5 $\mu$ g/ml) treatment on HLFs. (D) mRNA expression of *CDH1*, *VIM* and *SNAIL* in response to recombinant LOXL4 (5 $\mu$ g/ml) treatment on

A549 cells. Data represents mean  $\pm$  S.D. Similar results were seen in three independent experiments.

**Figure S4. Overexpression of LOXL4 does not impact EMT or lung fibroblast activation *in vitro*.**

(A) Western blotting confirmed overexpression of LOXL4 in HLFs. (B) Viability of HLFs transfected with LOXL4 overexpression construct after 48 hours examined by CellTiter-Glo assay. (C) mRNA expression of *COL1A1*, *COL3A1* and *FNI* in response to overexpression of LOXL4 on HLFs. (D) Western blotting confirmed overexpression of LOXL4 in human lung epithelial cells (A549). (E) Viability of A549 cells transfected with LOXL4 overexpression construct after 48 hours examined by CellTiter-Glo assay. (F) mRNA expression of *CDH1*, *VIM* and *SNAIL* in response to overexpression of LOXL4 on A549 cells. Data represents mean  $\pm$  S.D. Similar results were seen in three independent experiments.

**Figure S5. Blocking LOXL2/4 activity does not affect EMT or lung fibroblast activation *in vitro*.**

(A) Experiment scheme of examining the impact of blocking LOXL2/4 activity on EMT *in vitro*. (B) mRNA expression of *CDH1*, *VIM*, *SNAIL*, *LOXL2* and *LOXL4* in response to TGF $\beta$ 1 stimulation in A549 cells transfected with control, *LOXL2* or *LOXL4* siRNA. (C) mRNA expression of *CDH1*, *VIM*, *SNAIL* and *COL1A1* in response to TGF $\beta$ 1 stimulation in A549 cells treated with or without BAPN (pan-LOX inhibitor). (D) Experiment scheme of examining the impact of blocking LOXL2/4 activity on lung fibroblast activation *in vitro*. (E) mRNA expression of *ACTA2*, *COL1A1*, *COL1A2*, *LOXL2* and *LOXL4* in response to TGF $\beta$ 1 stimulation in HLFs transfected with control, *LOXL2* or *LOXL4* siRNA. (F) mRNA expression of *ACTA2*, *COL1A1*,



*COL3A1* and *COMP* in response to TGF $\beta$ 1 stimulation in HLFs treated with or without BAPN. Data represents mean  $\pm$  S.D. Similar results were seen in three independent experiments.

**Figure S6. PYD levels in *Loxl4* cKO and *Loxl2/4* cKO mice in the bleomycin model.**

(A) Schematic regime of tamoxifen-induced *Loxl4* and *Loxl2/4* deletion followed by IT bleomycin challenge. Mice were treated with deuterated water two weeks before the end of the study. Lung tissues were harvested for terminal analyses on day 24 after bleomycin challenge. (B-C) Quantification of lung collagen crosslinking by (B) total PYD and (C) PYD normalized by collagen from *Loxl4* cKO mice. (D-E) Quantification of lung collagen crosslinking by (D) total PYD and (E) PYD normalized by collagen from *Loxl2/4* cKO mice. Data represents mean  $\pm$  S.D. \*\*\*\*  $p < 0.0001$ . ns, not significant. p-value is calculated using one-way ANOVA.

**Figure S7. LOXL4 deficiency does not affect myofibroblasts proliferation or apoptosis in the bleomycin model.**

(A-B) (A) Representative immunofluorescent images of Ki67 and ACTA2 in lung tissue with quantification of (B) percentage of Ki67+/ACTA2+ cells per field. (C-D) (C) Representative immunofluorescent images of  $\gamma$ H2AX and ACTA2 in lung tissue with quantification of (B) percentage of  $\gamma$ H2AX+/ACTA2+ cells per field. Arrow heads present (C)  $\gamma$ H2AX+ nuclei/ACTA2+ cells. Data in (B) and (D) represent mean value of quantification from five random fields/image. \*  $p < 0.05$ , \*\*\*\*  $p < 0.0001$ . ns, not significant. p-value is calculated using one-way ANOVA.

**Figure S8. TGF $\beta$  ligand expression in the bleomycin model.**

mRNA expression of *Tgfb1*, *Tgfb2* and *Tgfb3* in lungs from WT or *Loxl4* cKO mice challenged by saline or bleomycin. Data represents mean  $\pm$  S.D. \*  $p < 0.05$ , \*\*  $p < 0.01$ . ns, not significant. p-value is calculated using one-way ANOVA.

**Table S1. List of primers used for qPCR.**
